# Supplementary material for: Temporal, spatial and household dynamics of Typhoid fever in Kasese district, Uganda
Source: PubMed Central journal article supplement (PMC6476469; doi:10.1371/journal.pone.0214650), 2019-04-22
Supplement: pone.0214650.s001.pdf [file pone.0214650.s001.pdf]

## **Supporting information**

# **Temporal, spatial and household dynamics of Typhoid fever in Kasese district, Uganda**

Bernadette Basuta Mirembe<sup>1\*</sup> Stella Mazeri<sup>3</sup>, Rebecca Callaby<sup>3</sup> Luke Nyakarahuka<sup>1</sup>  
Clovice Kankya<sup>1,2</sup> Adrian Muwonge<sup>1,3</sup>

<sup>1</sup>Department of Biosecurity Ecosystems and Veterinary Public Health, Makerere University, Kampala, Uganda

<sup>2</sup>Participatory Epidemiological Network in Uganda (PENU), Kampala, Uganda

<sup>3</sup>Division of Genetics and Genomics, The Roslin Institute, The Royal (Dick) School of Veterinary Studies, University of Edinburgh, UK Easter Bush Campus, EH259RG, Edinburgh, United Kingdom

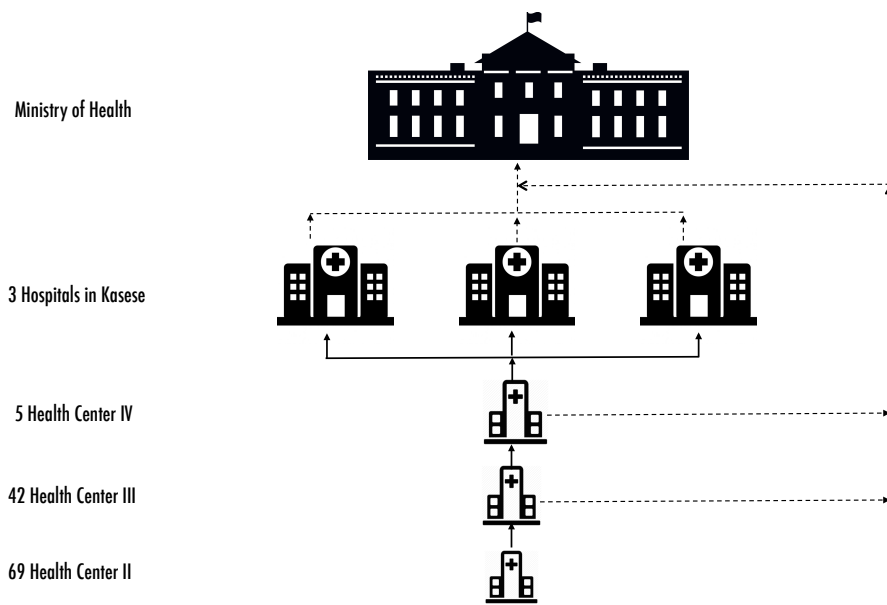

**Fig A:** The referral system in Uganda shown by solid arrows while the broken arrow shows the typhoid surveillance and reporting

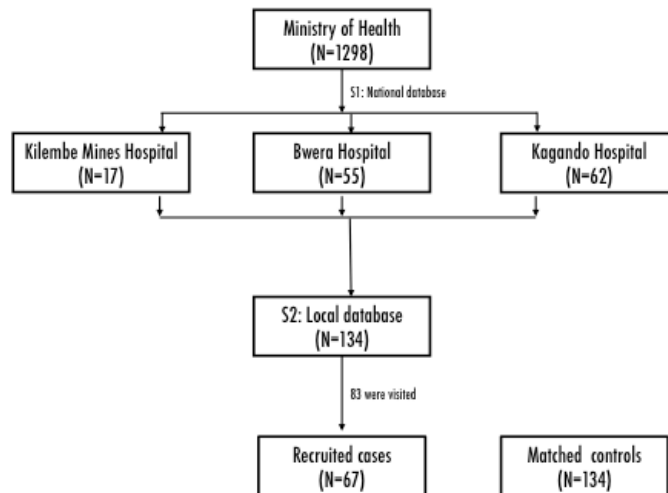

**Fig B:** Shows the case selection process from the surveillance and archived data at national and district level respectively

## Cross correlation analysis of typhoid incidence and weather pattern

C

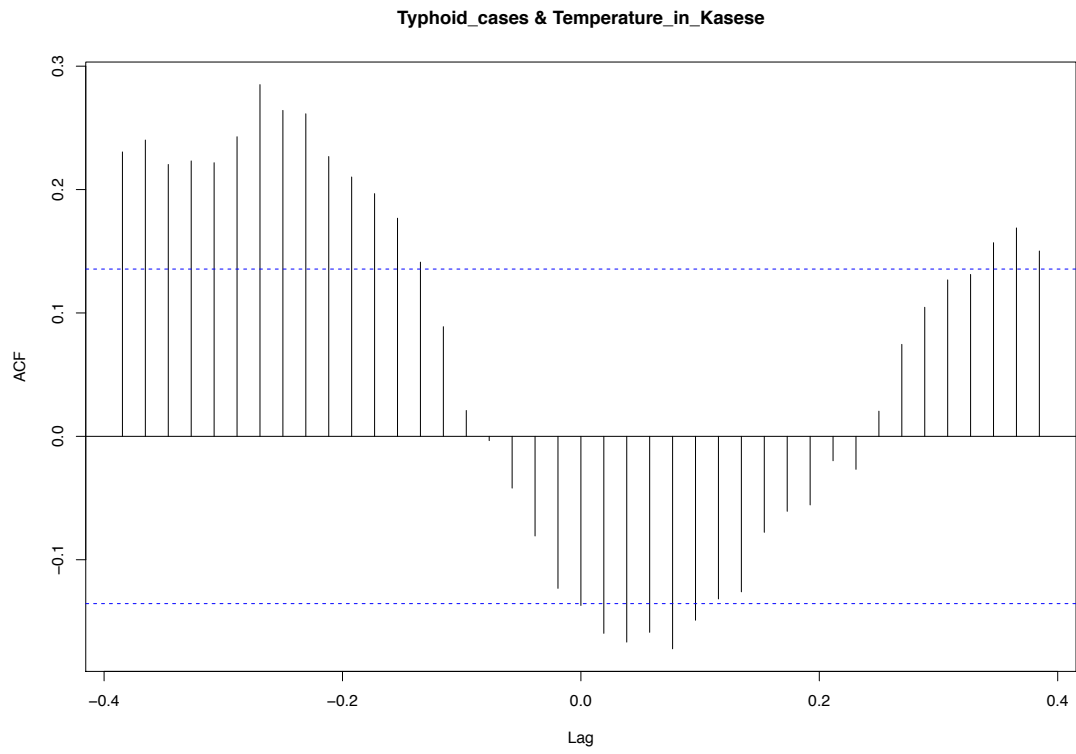

D

Typhoid\_cases & Precipitation\_in\_Kasese

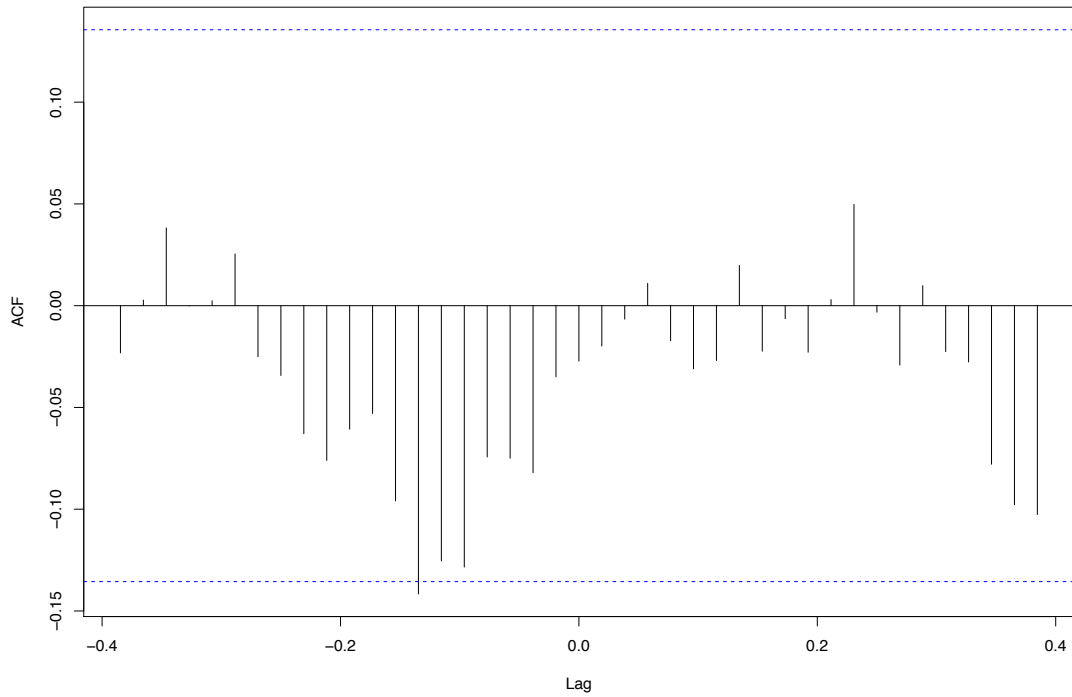

**Fig C and D** shows the cross correlation output between the typhoid case incidence and temperature and Rainfall respectively. The dotted blue line shows the level above or below which the autocorrelation function is statistically significant. A spike that is below or above this corresponds with a lag at which the two time series are significantly correlated.

## Case and control Matching

I

II

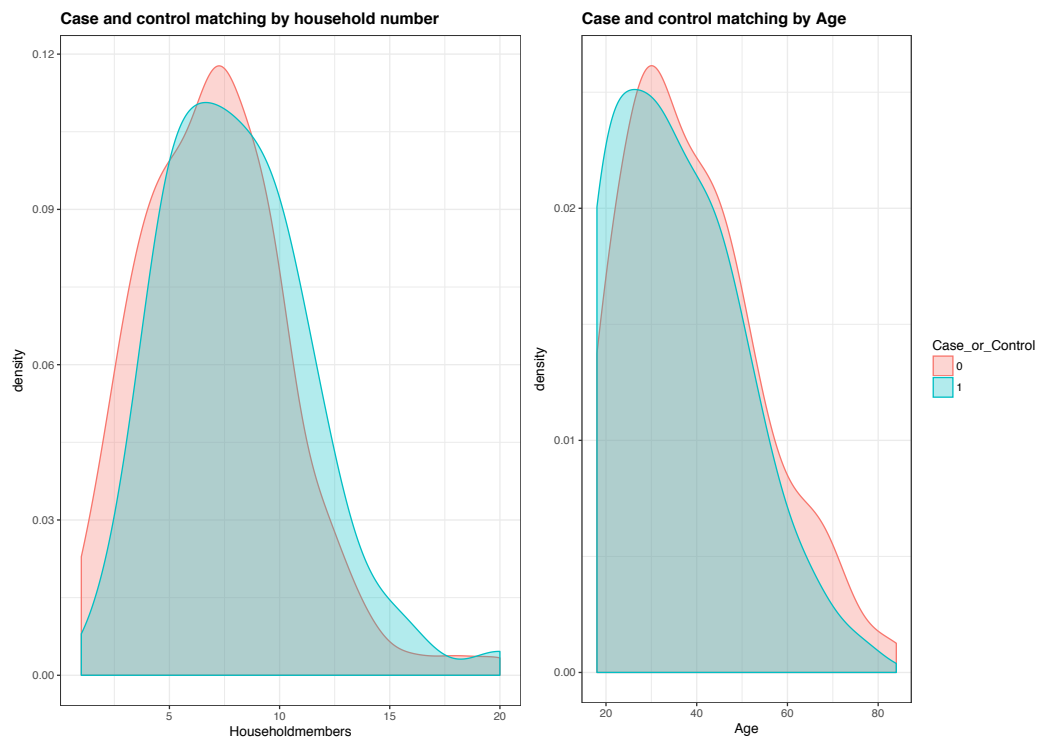

**Fig E** shows a density plot (equivalent to the proportion cases and controls) for a given number of household members (I) and age of the respondent (II). 0 and 1 represented in pink and light blue colour correspond to controls and cases respectively.

Matching cases and controls in Kasese

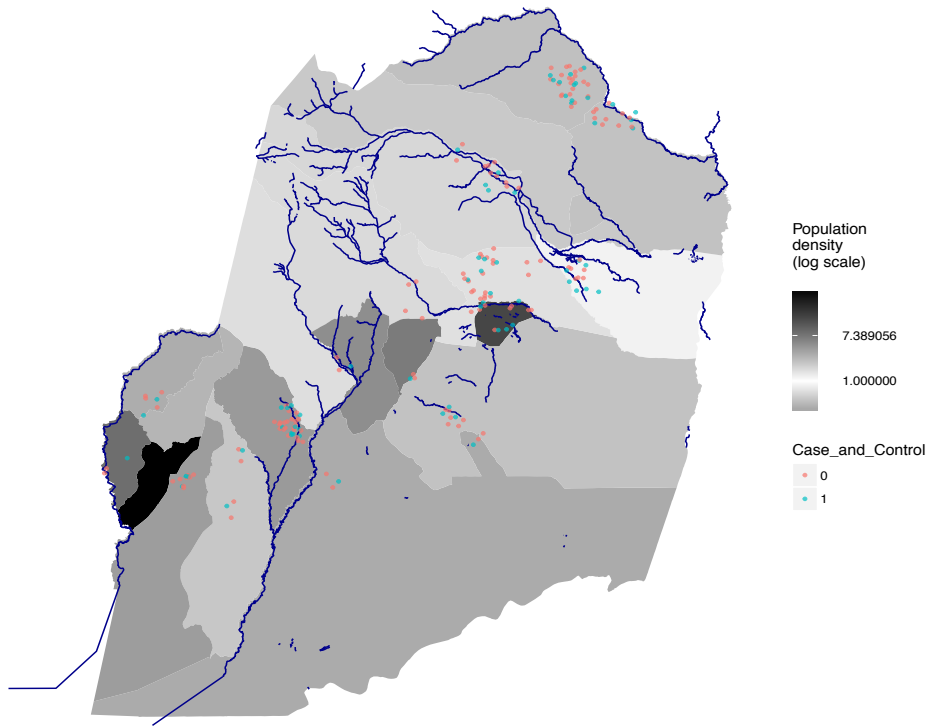

**Fig F:** Shows the spatial matching of cases and controls in Kasese district

### A Forecast model fitting with Arima

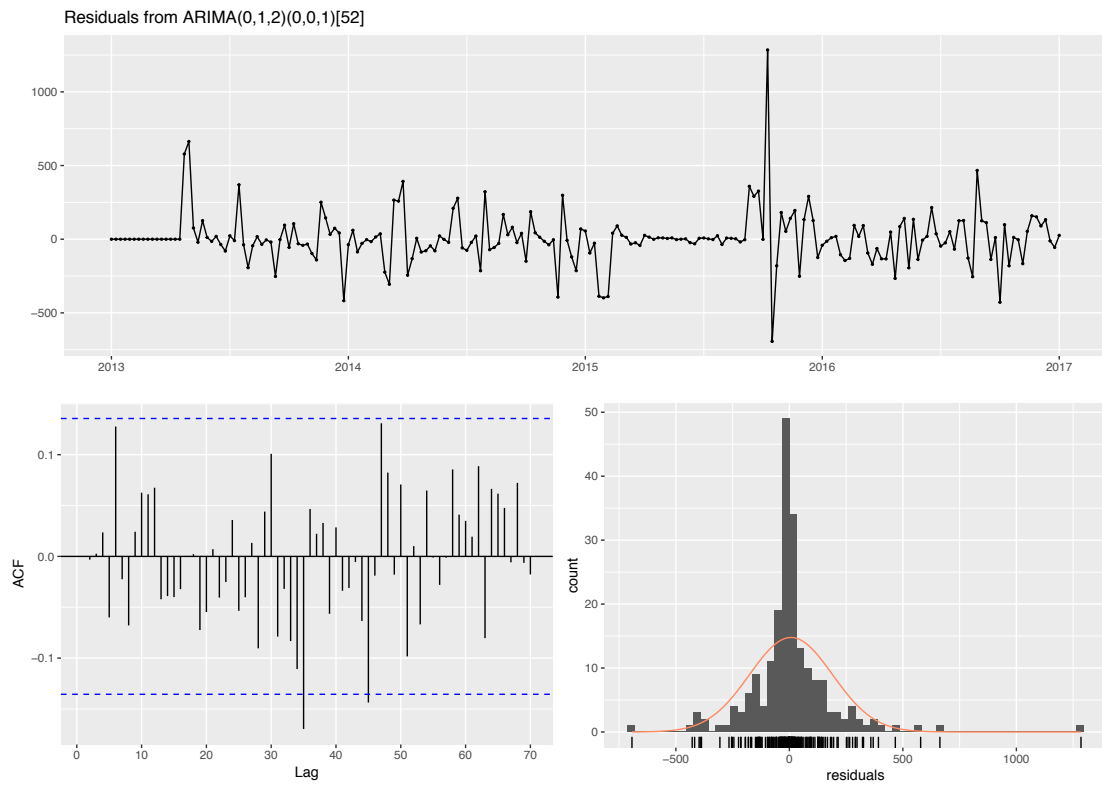

**Fig G** shows the model validation for the national typhoid time series model between 2013-2016.

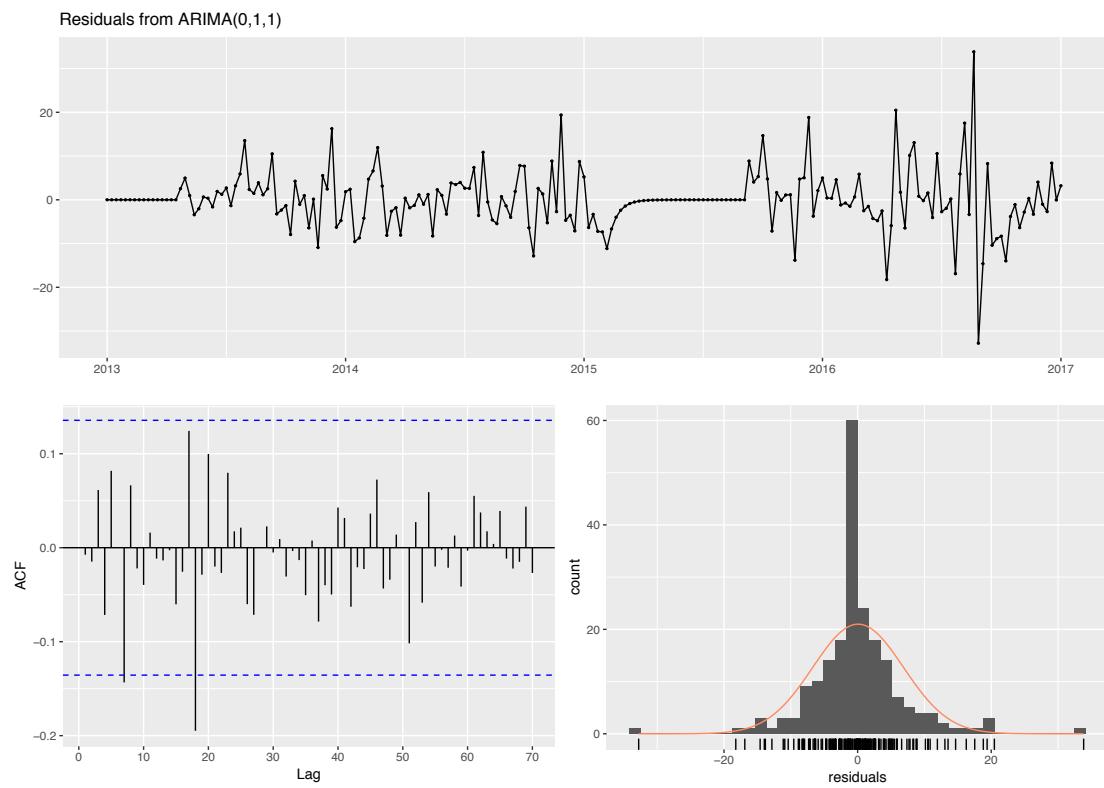

**Fig H** shows the model validation for the Kasese typhoid time series model between 2013-2016.

**Table A:** A univariate exploration of variable associations with being a typhoid case in Kasese district

| Variable                                      | Response            | Proportion of Cases (%) | Proportion of Controls (%) | P-value | Unadjusted OR (95% CI) |
|-----------------------------------------------|---------------------|-------------------------|----------------------------|---------|------------------------|
| <b>Gender of Respondent</b>                   | Male                | 25(37.3)                | 41(30.6)                   | Ref     | Ref                    |
|                                               | Female              | 42(62.6)                | 93(69.4)                   | 0.339   | 0.74(0.40-1.37)        |
| Age of Respondent                             | >=45                | 18(26.8)                | 46(34.3)                   | Ref     | Ref                    |
|                                               | 31-44               | 20(29.8)                | 41(30.5)                   | 0.211   | 1.24(0.58-2.69)        |
|                                               | 18-30               | 29(43.2)                | 47(35.0)                   | 0.576   | 1.57(0.77 3.26)        |
| Respondent's education level                  | None                | 8(11.9)                 | 40(29.8)                   | Ref     | Ref                    |
|                                               | Primary             | 33(49.2)                | 63(47.0)                   | 0.297   | 2.61(1.14- 6.60)       |
|                                               | Secondary           | 19(28.3)                | 19(14.2)                   | 0.001   | 5.00(1.91-14.10)       |
|                                               | Tertiary            | 7(10.4)                 | 11(8.2)                    | 0.061   | 3.18(0.93-10.92)       |
| County of Residence                           | Bukonzo East        | 17(25.3)                | 37(27.6)                   | Ref     | Ref                    |
|                                               | Bukonzo West        | 20(29.8)                | 37(27.6)                   | 0.687   | 1.17(0.53-2.61)        |
|                                               | Bukonzo North       | 13(19.4)                | 26(19.4)                   | 0.850   | 1.08(0.44-2.62)        |
|                                               | Busongora South     | 16(23.8)                | 30(22.3)                   | 0.726   | 1.16(0.50- 2.68)       |
|                                               | Kasese Municipality | 1(1.5)                  | 4(2.9)                     | 0.598   | 0.54(0.026- 4.03)      |
| Household population                          | >10 people          | 40(59.7)                | 75(55.9)                   | Ref     | Ref                    |
|                                               | 6-10 people         | 18(26.8)                | 46(34.3)                   | 0.58    | 1.29(0.49-3.27)        |
|                                               | 1-5 people          | 9(0.40)                 | 13(9.7)                    | 0.36    | 0.73(0.37-1.41)        |
| <b>Environmental water sources</b>            |                     |                         |                            |         |                        |
| Is there a water source within the household? | No                  | 52 (77.61)              | 110 (82.09)                | Ref     | Ref                    |
|                                               | Yes                 | 15 (22.39)              | 24 (17.91)                 | 0.45    | 1.32 (0.34-0.65)       |



---

|                                                   |                    |            |             |      |                   |
|---------------------------------------------------|--------------------|------------|-------------|------|-------------------|
| Water source used                                 | Borehole           | 10 (14.93) | 18 (13.43)  | 0.77 |                   |
|                                                   | River              | 28 (41.79) | 50 (37.31)  | 0.54 |                   |
|                                                   | Tap (municipal)    | 46 (68.66) | 95 (70.90)  | 0.74 |                   |
|                                                   | Rainwater Tank     | 6 (8.96)   | 17 (12.69)  | 0.43 |                   |
|                                                   | Unprotected spring | 4 (5.97)   | 16 (11.94)  | 0.19 |                   |
|                                                   | Protected spring   | 13 (19.4)  | 23 (17.16)  | 0.70 |                   |
|                                                   | Pond               | 2 (2.99)   | 3 (2.24)    | 0.75 |                   |
|                                                   | Shallow well       | 1 (1.49)   | 2 (1.49)    | 1    |                   |
|                                                   | Stream             | 2 (2.99)   | 2 (1.49)    | 0.48 |                   |
| Is it the water treated at the source?            | I don't know       | 2(2.9)     | 6(4.5)      | Ref  | Ref               |
|                                                   | Yes                | 1 (1.54)   | 19(14.84)   | 0.16 | 0.16 (0.007-1.92) |
|                                                   | No                 | 64 (98.46) | 109(85.16)  | 0.50 | 1.76 (0.39-12.27) |
| Is it stagnant water?                             | I don't know       | 2(2.90)    | 6(4.51)     | Ref  | Ref               |
|                                                   | Yes                | 1 (1.54)   | 6 (4.69)    | 0.58 | 1.57(0.35- 0.95)  |
|                                                   | No                 | 64 (98.46) | 122 (95.31) | 0.60 | 0.50(0.01-6.68)   |
| Is the source shared with animals?                | I don't know       | 2(2.90)    | 6(4.51)     | Ref  | Ref               |
|                                                   | Yes                | 20 (30.77) | 30 (23.44)  | 0.42 | 2 (0.41-14.59)    |
|                                                   | No                 | 45 (69.23) | 98 (76.56)  | 0.70 | 1.38 (0.30-9.65)  |
| Is there direct human access to the water source? | I don't know       | 2(2.90)    | 6(4.51)     |      | Ref               |
|                                                   | Yes                | 20 (30.77) | 100 (74.63) | 0.55 | 1.67 (0.34-12.11) |
|                                                   | No                 | 45 (69.23) | 34 (25.37)  | 0.65 | 1.47 (0.32-10.29) |

---

---

**Individual handling of drinking water in household**

---

|                                                 |     |            |             |        |                   |
|-------------------------------------------------|-----|------------|-------------|--------|-------------------|
| Is drinking water treated?                      | Yes | 19 (28.36) | 30 (11.46)  | Ref    | Ref               |
|                                                 | No  | 48 (71.64) | 104 (77.61) | 0.35   | 1.37 (0.69-2.61)  |
| <b>Water treatment method</b>                   |     |            |             |        |                   |
| Boiling                                         | No  |            |             | Ref    | Ref               |
|                                                 | Yes | 19 (28.36) | 20 (14.93)  | 0.0252 | 2.26 (1.10-4.62)  |
| Chlorination                                    | No  | 59(88.0)   | 122(91.0)   | Ref    | Ref               |
|                                                 | Yes | 8 (11.94)  | 12 (8.96)   | 0.51   | 1.38 (0.52-3.52)  |
| Solar disinfection                              | No  | 66(98.5)   | 134(100)    | Ref    | Ref               |
|                                                 | Yes | 1 (1.49)   | 0           | 0.99   | -                 |
| Filtration                                      | No  | 66(98.5)   | 133(99.25)  | Ref    | Ref               |
|                                                 | Yes | 1 (1.49)   | 1 (0.75)    | 0.62   | 2.01 (0.07-51.49) |
| Are vessel/ receptacles cleaned on the outside? | No  | 18 (28.36) | 60 (44.78)  | Ref    | Ref               |
|                                                 | Yes | 48 (71.64) | 73 (55.22)  | 0.026  | 2.05 (1.10-3.91)  |
| Is the vessel free of algae?                    | No  | 23 (35.82) | 72 (53.73)  | Ref    | Ref               |
|                                                 | Yes | 43 (64.18) | 61 (46.27)  | 0.017  | 2.08 (1.14-3.84)  |
| Does the vessel have a cover?                   | No  | 36 (55.23) | 85 (63.43)  | Ref    | Ref               |

---

---

|                                                        |     |            |             |       |                   |
|--------------------------------------------------------|-----|------------|-------------|-------|-------------------|
|                                                        | Yes | 30 (44.78) | 48 (36.59)  | 0.26  | 1.41 (0.77-2.55)  |
| Is it sealed with no leakages?                         | No  | 4 (7.46)   | 21 (15.67)  | Ref   | Ref               |
|                                                        | Yes | 62 (92.54) | 112 (84.33) | 0.11  | 2.30 (0.89-7.17)  |
| Are the water collection vessels clean on the outside? | No  | 27 (40.30) | 74 (55.97)  | Ref   | Ref               |
|                                                        | Yes | 40 (59.70) | 59 (44.03)  | 0.037 | 1.88 (1.04-3.44)  |
| Are the water collection vessels free of algae?        | No  | 46 (68.66) | 92 (68.66)  | Ref   | Ref               |
|                                                        | Yes | 21 (31.34) | 41 (31.34)  | 1     | 1 (0.52-1.87)     |
| Do the water collection vessels have covers?           | No  | 60 (89.55) | 115 (86.57) | Ref   | Ref               |
|                                                        | Yes | 7 (10.45)  | 18 (13.43)  | 0.54  | 0.15 (0.28-1.83)  |
| Are the water collection vessels free of leakages?     | No  | 5 (7.46)   | 30 (22.39)  |       |                   |
|                                                        | Yes | 62 (92.54) | 104 (77.61) | 0.01  | 3.57 (1.42-10.92) |
| <b>Reasons for not treating water</b>                  |     |            |             |       |                   |
| Lack of chlorine tablets                               | No  | 61         | 125         | Ref   | Ref               |
|                                                        | Yes | 6 (32.84)  | 9 (17.61)   | 0.01  | 2.36 (1.94-4.67)  |
| Believe water is safe for drinking                     | No  | 55(82.0)   | 102(76.1)   | Ref   | Ref               |

---

---

|                                     |     |            |             |        |                  |
|-------------------------------------|-----|------------|-------------|--------|------------------|
|                                     | Yes | 12(18.0)   | 32(23.9)    | 0.33   | 0.69(0.32-1.42)  |
| Lack of firewood*                   | No  | 45(67.1)   | 111(82.8)   | Ref    | Ref              |
|                                     | Yes | 22(32.9)   | 23(17.2)    | 0.0133 | 2.35(1.19- 4.67) |
| No time to boil water               | No  | 66(98.5)   | 133(99.3)   | Ref    | Ref              |
|                                     | Yes | 1(1.5)     | 1(0.7)      | 0.62   | 2.01(0.07-51.49) |
| Water is tasteless when treated     | No  | 57(75.1)   | 125(93.3)   | Ref    | Ref              |
|                                     | Yes | 10(15.9)   | 9(6.7)      | 0.06   | 2.43(0.93-6.45)  |
| Unavailability of the chlorine tabs | No  | 65(97.1)   | 125(93.3)   | Ref    | Ref              |
|                                     | Yes | 2(2.9)     | 9(6.7)      | 0.286  | 0.42(0.06-1.71)  |
| Do you have access to safe water?   | No  | 13 (19.40) | 25 (18.66)  | Ref    | Ref              |
|                                     | Yes | 54 (80.60) | 109 (81.34) | 0.898  | 0.95 (0.46-2.05) |

---

#### Household hygiene

---

|                                                     |     |            |             |      |                  |
|-----------------------------------------------------|-----|------------|-------------|------|------------------|
| Do you wash hands before collecting drinking water? | No  | 18 (26.87) | 34 (25.37)  | Ref  | Ref              |
|                                                     | Yes | 49 (73.13) | 100 (74.63) | 0.82 | 0.92 (0.48-1.83) |
| Do wash hands after using the latrine?              | No  | 49 (73.13) | 79 (58.96)  | Ref  | Ref              |
|                                                     | Yes | 18 (26.87) | 55 (41.04)  | 0.05 | 0.53 (1.05-4.13) |

---

---

|                                                      |     |            |             |       |                   |
|------------------------------------------------------|-----|------------|-------------|-------|-------------------|
| Do wash hands after urination?                       | No  | 46 (68.66) | 110 (82.09) | Ref   | Ref               |
|                                                      | Yes | 21 (31.34) | 24 (17.91)  | 0.03  | 2.09 (1.05-4.13)  |
| Do you was hand with soap and water?                 | No  | 19(29.4)   | 59(45.6)    | Ref   | Ref               |
|                                                      | Yes | 48 (71.64) | 73 (54.48)  | 0.02  | 2.11 (1.14-4.03)  |
| Do you was hand with water only                      | No  | 63         | 123         | Ref   | Ref               |
|                                                      | Yes | 4 (5.97)   | 11 (8.21)   | 0.57  | 0.709 (0.19-2.17) |
| Do you was hand with ash and water                   | No  | 65(97.9)   | 132(98.5)   | Ref   | Ref               |
|                                                      | Yes | 2 (2.99)   | 2 (1.49)    | 0.48  | 2.03 (0.24-17.23) |
| <b>Personal toilet cleaning</b>                      |     |            |             |       |                   |
| Do you use newspapers for cleaning after toilet      | No  | 36(53.7)   | 87(64.9)    | Ref   | Ref               |
|                                                      | Yes | 31(46.3)   | 47(35.1)    | 0.126 | 1.59(0.87-2.90)   |
| Do you use water only for cleaning after toilet      | No  | 48(71.6)   | 99(73.8)    | Ref   | Ref               |
|                                                      | Yes | 19(28.4)   | 35(26.2)    | 0.736 | 1.11(0.57 -2.14)  |
| Do you use water with soap for cleaning after toilet | No  | 61(91.0)   | 129(96.3)   | Ref   | Ref               |

---

---

|                                                               |     |            |            |       |                   |
|---------------------------------------------------------------|-----|------------|------------|-------|-------------------|
|                                                               | Yes | 6(9.0)     | 5(3.73)    | 0.136 | 2.53(0.73- 9.11)  |
| Do you use use natural leaves for<br>cleaning<br>after toilet | No  | 43(64.2)   | 67(50)     | Ref   | Ref               |
|                                                               | Yes | 24(35.8)   | 67(50)     | 0.136 | 0.55(0.30- 1.01)  |
| Do you handle children waste?                                 | No  | 28 (41.79) | 59 (44.03) | Ref   | Ref               |
|                                                               | Yes | 39 (58.21) | 75 (55.97) | 0.76  | 1.096 (0.60-1.99) |

---

**Household food safety**

---

|                                          |     |            |             |       |                   |
|------------------------------------------|-----|------------|-------------|-------|-------------------|
| Do you prepare food on raised<br>ground? | No  | 40 (59.70) | 76 (56.72)  | Ref   | Ref               |
|                                          | Yes | 27 (40.30) | 58 (43.28)  | 0.69  | 1.13 (0.62-2.06)  |
| Do you ever eat cold leftover food?      | No  | 59 (88.08) | 114 (85.07) | Ref   | Ref               |
|                                          | Yes | 8 (11.94)  | 20 (14.93)  | 0.205 | 0.026 (0.30-1.31) |
| Do you raw eat vegetables?               | No  | 3 (4.48)   | 10 (7.52)   | Ref   | Ref               |
|                                          | Yes | 64 (95.52) | 123 (93.50) | 0.99  | -                 |

---

|                                                                       |     |            |             |       |                    |
|-----------------------------------------------------------------------|-----|------------|-------------|-------|--------------------|
| Do you share food with others in the same container?                  | No  | 2 (2.99)   | 12 (6.97)   | Ref   | Ref                |
|                                                                       | Yes | 65 (97.01) | 122 (91.04) | 0.136 | 3.197 (0.84-20.94) |
| Do animals have access to your food preparation area?                 | No  | 44 (65.67) | 93 (69.92)  | Ref   | Ref                |
|                                                                       | Yes | 23 (34.33) | 40 (30.08)  | 0.99  | -                  |
| Do you own animals?                                                   | No  | 11 (16.42) | 34 (25.37)  | Ref   | Ref                |
|                                                                       | Yes | 56 (83.58) | 100 (74.63) | 0.15  | 1.73 (0.84-3.82)   |
| FPA accessed by animals:                                              | No  | 25 (26.32) | 49 (18.48)  | Ref   | Ref                |
|                                                                       | Yes | 42 (73.68) | 85 (82.52)  | 0.91  | 0.98 (0.52-1.78)   |
| Do you have barriers physical barriers to your food preparation area? | No  | 29 (43.28) | 59 (44.03)  | Ref   | Ref                |
|                                                                       | Yes | 38 (56.72) | 75 (55.97)  | 0.42  | 1.03 (0.62-2.94)   |
| Do you ever find animal droppings in your food preparation area?      | No  | 51 (76.12) | 113 (84.33) | Ref   | Ref                |
|                                                                       | Yes | 16 (23.88) | 21 (15.67)  | 0.16  | 1.69 (0.80-3.46)   |
| Found human excrements in food preparation area?                      | No  | 64 (95.52) | 128 (96.24) | Ref   | Ref                |

|                                                    |     |            |             |        |                  |
|----------------------------------------------------|-----|------------|-------------|--------|------------------|
|                                                    | Yes | 3 (4.48)   | 5 (3.76)    | 0.987  | -                |
| <b>Household sanitation</b>                        |     |            |             |        |                  |
| Does this house hold have a latrine?               |     |            |             |        |                  |
|                                                    | No  | 0          | 4 (2.99)    | Ref    | Ref              |
|                                                    | Yes | 67 (100)   | 130 (97.01) | 0.98   | -                |
| Is the latrine in use?                             |     |            |             |        |                  |
|                                                    | No  | 1 (1.49)   | 1 (0.77)    | Ref    | Ref              |
|                                                    | Yes | 66 (98.51) | 129 (99.23) | 0.98   | -                |
| <b>Household contamination with Salmonella spp</b> |     |            |             |        |                  |
| Salmonella spp isolated in house hold environment? |     |            |             |        |                  |
|                                                    | No  | 51 (79.69) | 110 (82.71) | Ref    | Ref              |
|                                                    | Yes | 13 (20.31) | 23 (17.29)  | 0.608  | 1.22 (0.56-2.57) |
| Salmonella spp isolated from drinking water        |     |            |             |        |                  |
|                                                    | No  | 58 (86.5)  | 126 (94.02) | Ref    | Ref              |
|                                                    | Yes | 9 (14.29)  | 8 (6.15)    | 0.0804 | 2.44(0.89-6.82)  |
| Salmonella spp isolated from water source          |     |            |             |        |                  |
|                                                    | No  | 53 (91.38) | 108 (89.26) | Ref    | Ref              |
|                                                    | Yes | 5 (8.62)   | 13 (10.74)  | 0.659  | 0.78 (0.24-2.19) |
| Salmonella spp isolated from of the faecal sample  |     |            |             |        |                  |
|                                                    | No  | 65 (87.50) | 128 (77.42) | Ref    | Ref              |



---

|     |           |           |       |                  |
|-----|-----------|-----------|-------|------------------|
| Yes | 2 (12.50) | 4 (22.58) | 0.612 | 0.65 (0.09-2.94) |
|-----|-----------|-----------|-------|------------------|

---

\*Lack of firewood means lack of any form of fuel i.e. firewood and charcoal  
(Biofuels)

**Table B** shows the case predictions from the time series forecasting framework and the empirical data at national and district level for the first quarter of 2017

| Month    | Week | Empirical data |        | Predicted data |        | 95%CI             |                       |
|----------|------|----------------|--------|----------------|--------|-------------------|-----------------------|
|          |      | National       | Kasese | National       | Kasese | National          | Kasese                |
| Setting  |      | National       | Kasese | National       | Kasese | National          | Kasese                |
| January  | 1    | 1850           | 6      | 1832.47        | 9.10   | (1557.01-2107.92) | ( -0.78 -<br>18.99 )  |
| January  | 2    | 1861           | 13     | 1803.24        | 6.64   | (1417.70-2188.7)  | (-4.25-17.54 )        |
| February | 4    | 1165           | 7      | 1653.34        | 5.68   | (1182.81-2123.88) | (-6.14-17.51)         |
| February | 5    | 1578           | 6      | 1478.72        | 3.48   | (1417.70-2188.78) | (-9.20-16.17)         |
| February | 6    | 1249           | 8      | 1264.34        | 2.88   | (934.35- 2019.10) | (-10.60-16.37)        |
| February | 7    | 1391           | 12     | 1220.40        | 3.39   | (658.58-1870.09)  | ( -10.85 -<br>17.64 ) |
| February | 8    | 1631           | 0      | 1251.63        | 5.78   | (557.30-1883.50)  | ( -9.19-20.75)        |
| March    | 9    | 1422           | 8      | 1187.08        | 6.71   | (535.76 -1967.50) | (-8.94 - 22.37 )      |
| March    | 10   | 1385           | 3      | 1161.18        | 2.14   | (422.8-1952.81)   | (-14.173-18.46 )      |
| March    | 11   | 1739           | 10     | 1183.61        | 2.67   | (349.91-1972.25)  | (-14.28-19.62)        |

---



**Text A:** Questionnaire used in the case-control study

**Questionnaire number:** ..... **GPS reading:** .....

**A: Location details**

District: Kasese County: ..... Sub-county: .....

Parish: ..... Village/LCI: .....

**B: Demographic details:**

B1. Age:.....

B2. Sex:

1. Female
2. Male

B3. Level of formal education:

1. None
2. Primary
3. Secondary
4. Tertiary

B4. Number of people in the household: .....

B5. Age categories of members:

1. Below 10 years
2. 11-19 years
3. 20-35 years
4. 45-65 years
5. Above 65 years

B5. Position in the household: .....

**C: Water details**

C1. Is the water sourced within the household?

1. Yes
2. No

C2. Where do you get from the water used in this household?

1. Borehole
2. River
3. Lake
4. Tap
5. Rainwater
6. Open spring
7. Protected spring
8. Dug well

C3. What collection vessel do you use to get the water?

1. Jerry can
2. Pot
3. Bucket
4. Basin

C4. Do you have a separate vessel for storage of drinking water?

1. Yes
2. No

C5. If yes, where do you store water meant for drinking?

1. Specified jerry can
2. Pot

C6. Do you treat your drinking water before storage?

1. Yes
2. No

C7. How do you treat this water?

1. Boiling
2. Solar disinfection
3. Chlorination
4. Filtration

C8: If no @ C6, why don't you treat your water?

.....

C8. In case it is a pot, is there a designated cup meant to help retract the water?

1. Yes
2. No

C9. Where do you keep it?

1. In the cupboard
2. On top of the pot
3. On the drying rank
4. Others. Specify: .....

C10. Do all family members have free access to this drinking water?

1. Yes
2. No

C11. Do you wash your hands before getting drinking water?

1. Always
2. Sometimes
3. Rarely
4. Not at all

**D: Hygiene**

D1. Do you wash your hands after visiting the toilet or latrine?

1. Always
2. Sometimes
3. Rarely
4. Not at all

Including urination? .....

D2. From where do you wash them?

1. At a designated hand washing facility
2. Using a utensil near the kitchen
3. Direct from water storage vessel

D3. What do you use when washing your hands?

1. With water only
2. With soap and water
3. With ash and water

D4. What method or material do you use for anal cleansing when in the toilet?

1. None
2. Use papers
3. Use toilet paper
4. Use natural anal cleansing leaves
5. Rub against a surface
6. Water only
7. Water and soap

D5. Do you handle children's faecal waste?

1. Yes
2. No

D6. If yes, how do you deal with children's faecal waste?

1. Dump them in the toilet
2. Dump them away from the compound but not in the toilet
3. Just leave them where they are and pour soil/ash

### **E: Food practises**

E1. From where do you prepare food?

1. On raised ground
2. On the ground

E2. How soon do you eat the food you have prepared after preparation?

1. Immediately when still hot
2. Not immediately but still warm
3. Not immediately when it has already cooled

E3. If not immediately, where do you store the food?

1. On the ground
2. In the cabinet
3. On the table
4. In a refrigerator

E4. Do you always preheat the food before consumption?

1. Yes
2. No

E5. Do you usually have left over food?

1. Yes
2. No

E6. How do you deal with leftovers?

1. Eat them
2. Throw them away
3. Feed them to animals

E7. Where do you store the leftovers?

1. On the ground
2. In the cabinet
3. On the table

E8. Do you store your utensils in the kitchen?

1. Yes
2. No



E9. Where do you put the utensils to dry after washing?

1. On the plate stand outside or in the kitchen
2. On the ground in saucepan or basin
3. On the ground on a mat or sack outside

E10. Do you eat any ready to eat foods outside the home?

1. Yes
2. No

E11. Which kind of food?

.....

E12. Do you usually have vegetables as part of the diet?

1. Yes
2. No

E13. How do you prepare these before being eaten?

1. Wash them
2. Cook them
3. Wash and/or cook sometimes
4. Just eat them raw without washing or cooking all the time

E14. Do you share the same bowl or plate while eating food especially millet bread?

1. Yes
2. No

E5. Do you have any animals?

1. Yes
2. No

Specify: .....

E5. Do the animals access the food preparation area?

1. Yes
2. No

**Text B:** Consent form used in the case control study

**Introduction**

I am.....from Makerere University College of Veterinary medicine, Animal resources and Biosecurity. I am carrying out a research about typhoid fever aimed establishing the risk factors that can be related to transmission of the disease within the household and you have been selected as a participant. The burden of typhoid fever in this district is high despite interventions by district health department therefore this study will aim at establishing where the organisms that cause typhoid fever could be sourced in your household and potential practises that could dispose you to them. In order to come up with this information, I will take samples from your drinking water, water source, any food suspected to carry the organisms and fresh human and animal faeces that have potential of contaminating food and water in this household. I will also administer a questionnaire to assess practises related to transmission of typhoid fever. Aside from the valuable time you will offer for this study, the information will never be used against you and will be confidential to purposes only related to this study. The information will not bear your name, only the code that will be awarded to this household. Your participation will not reward you direct benefits however will benefit your community through providing information that can be used in future research or intervention projects. You remain with the right to decline participation in this study or seize your participation at anytime. For more information, please contact the Principal Researcher Mirembe Bernadette Basuta on 0714 145 627 or at Makerere University CoVAB 7062, Kampala. Thank you.

**Certificate of consent to the study**

I confirm that I have read the information above concerning the study and have had the opportunity to ask questions which were answered adequately. I understand that my participation is voluntary and I am free to withdraw consent at any time, without giving a reason or my legal rights being affected. I understand that data collected can be used for purposes of monitoring and auditing by the University officials to ensure that the study is being conducted properly. I consent to access of relevant information needed and I accept to participate in this study.

Name: ..... Signature: .....
